# Supplementary material
Source: publisher site journal article supplement (https://www.dovepress.com/article/374335)
Supplement: Supplementary file 1 [file get_supplementary_file.php]

**Supplementary materials**

Supplementary Table 1: Nucleotide sequence of the specific primers used for PCR amplification.

| Number | Gene function | Forward primer (5’-3’) | Reverse primer (5’-3’) |
| --- | --- | --- | --- |
| Q010_05497 | Housekeeping gene 16s rRNA | ACG CTT TCG CAC CTC AGT GT | CCT GGG AAC TGC ATC CAA AA |
| Q010_02099 | Acyl-homoserine lactone acylase *Pvd*Q | GAC GCT CGA GGA AAT GGT CA | AAG TAG ACG AAG CCA CTG CC |
| Q010_02058 | Pyoverdine non-ribosomal peptide synthase/polyketide synthase *Pvd*L | GCA TGA TCC GCA GGT CTA CA | GAT CAC GTC GTT CTC GTC CA |
| Q010_06256 | Type II secretion system protein *Gsp*H | CGC GCC AGT ACC GAG CCA G | CGT CGT CCAG CAC AGC CAC |
| Q010_06248 | Type II secretion system protein *Gsp*E | CGC CTG ATG GAC GAT ATC CC | CAC CGA ATG GGT CTC GAA GG |
| Q010_03784 | Type 4b pilus Flp major pilin | CCC TGT TCG TGT ATT GCA AAG TT | CTT TCA GAC CGC CGA CGA TA |
| Q010_01891 | Type 1 fimbrial protein | GAG TGG GAA AGG GAG AAA CCA | TGC ATG TAG TGA AGA AGG CAT TG |
| Q010_02816 | Translocation protein in type III secretion | CCT GGC AGC AGC AGG TAG G | AGG TAG AAC GCA CGG TTG TAC A |
| Q010_02805 | CesD/SycD/LcrH family type III secretion system chaperone | GCA CCC TGG CGA TGC TT | AGA AAG TAG CGG GCG TCG TA |
| Q010_02806 | Type III secretion protein | AGG ACA GCC CCG AGT ATG C | GAC CGG GTT GTT GTC CTT CTC |
| Q010_03570 | Type III secretion system effector cytotoxin *Exo*U | TTG CCG AGA ACA TTC GTA AGG | CGA TAT CGT TCA GCG CTT GA |
| Q010_02802 | *Exo*S synthesis protein C | AGC GCG AGC GTC TGT TG | AGC GCG AGC GTC TGT TG |

Gene Q010_02099 and Gene Q010_02058 were participated in iron metabolic process. Gene Q010_06256, Gene Q010_06248, Gene Q010_03784 and Gene Q010_01891 were involved with Type 2 Secretion Systerm. Gene Q010_02816, Gene Q010_02805, Gene Q010_02806, Gene Q010_03570 and Gene Q010_02802 were involved with Type 3 Secretion Systerm. 16s rRNA was used as an internal control for *P. aeruginosa*.

Supplementary Table 2: Detailed information about GO functional analysis

| ID | Description | Ratio_in_study | P_uncorrected | Namespace |
| --- | --- | --- | --- | --- |
| GO:0030254 | protein secretion by the type III secretion system | 7/557 | 0.000405 | biological_process |
| GO:0002790 | peptide secretion | 15/557 | 0.00068 | biological_process |
| GO:0009306 | protein secretion | 15/557 | 0.00068 | biological_process |
| GO:0032940 | secretion by cell | 15/557 | 0.000794 | biological_process |
| GO:0046903 | secretion | 15/557 | 0.00124 | biological_process |
| GO:0030257 | type III protein secretion system complex | 3/557 | 0.00223 | cellular_component |
| GO:0071806 | protein transmembrane transport | 12/557 | 0.00237 | biological_process |
| GO:0004803 | transposase activity | 3/557 | 0.00523 | molecular_function |
| GO:0042952 | beta-ketoadipate pathway | 3/557 | 0.00523 | biological_process |
| GO:0016708 | oxidoreductase activity, acting on paired donors, with incorporation or reduction of molecular oxygen, NAD(P)H as one donor, and incorporation of two atoms of oxygen into one donor | 4/557 | 0.00694 | molecular_function |
| GO:0007155 | cell adhesion | 4/557 | 0.00694 | biological_process |
| GO:0047569 | 3-oxoadipate CoA-transferase activity | 2/557 | 0.00709 | molecular_function |
| GO:0099621 | undecaprenyl-phosphate 4-deoxy-4-formamido-L-arabinose transferase activity | 2/557 | 0.00709 | molecular_function |
| GO:0015734 | taurine transport | 2/557 | 0.00709 | biological_process |
| GO:0015031 | protein transport | 17/557 | 0.0073 | biological_process |
| GO:0044419 | interspecies interaction between organisms | 8/557 | 0.00738 | biological_process |
| GO:0009297 | pilus assembly | 4/557 | 0.0102 | biological_process |
| GO:0022610 | biological adhesion | 4/557 | 0.0102 | biological_process |
| GO:0015833 | peptide transport | 18/557 | 0.0108 | biological_process |
| GO:0042886 | amide transport | 18/557 | 0.0121 | biological_process |
| GO:0009405 | pathogenesis | 7/557 | 0.0128 | biological_process |
| GO:0033036 | macromolecule localization | 17/557 | 0.0131 | biological_process |
| GO:0008104 | protein localization | 17/557 | 0.0131 | biological_process |
| GO:0045184 | establishment of protein localization | 17/557 | 0.0131 | biological_process |
| GO:0018958 | phenol-containing compound metabolic process | 4/557 | 0.0143 | biological_process |
| GO:0030031 | cell projection assembly | 6/557 | 0.0154 | biological_process |
| GO:0006313 | transposition, DNA-mediated | 3/557 | 0.0161 | biological_process |
| GO:0032196 | transposition | 3/557 | 0.0161 | biological_process |
| GO:0006304 | DNA modification | 3/557 | 0.0161 | biological_process |
| GO:0019336 | phenol-containing compound catabolic process | 3/557 | 0.0161 | biological_process |
| GO:0043107 | type IV pilus-dependent motility | 4/557 | 0.0193 | biological_process |
| GO:0015848 | spermidine transport | 2/557 | 0.0201 | biological_process |
| GO:0018618 | anthranilate 1,2-dioxygenase (deaminating, decarboxylating) activity | 2/557 | 0.0201 | molecular_function |
| GO:0019694 | alkanesulfonate metabolic process | 2/557 | 0.0201 | biological_process |
| GO:0015606 | spermidine transmembrane transporter activity | 2/557 | 0.0201 | molecular_function |
| GO:1903711 | spermidine transmembrane transport | 2/557 | 0.0201 | biological_process |
| GO:0046306 | alkanesulfonate catabolic process | 2/557 | 0.0201 | biological_process |
| GO:0006952 | defense response | 2/557 | 0.0201 | biological_process |
| GO:0044273 | sulfur compound catabolic process | 2/557 | 0.0201 | biological_process |
| GO:0043683 | type IV pilus biogenesis | 3/557 | 0.0242 | biological_process |
| GO:0016863 | intramolecular oxidoreductase activity, transposing C=C bonds | 3/557 | 0.0242 | molecular_function |
| GO:0030030 | cell projection organization | 7/557 | 0.0282 | biological_process |
| GO:0005576 | extracellular region | 6/557 | 0.0311 | cellular_component |
| GO:0042995 | cell projection | 4/557 | 0.0322 | cellular_component |
| GO:0042908 | xenobiotic transport | 3/557 | 0.034 | biological_process |
| GO:0015847 | putrescine transport | 2/557 | 0.0379 | biological_process |
| GO:0008752 | FMN reductase activity | 2/557 | 0.0379 | molecular_function |
| GO:0072488 | ammonium transmembrane transport | 2/557 | 0.0379 | biological_process |
| GO:0019333 | denitrification pathway | 2/557 | 0.0379 | biological_process |
| GO:0008704 | 5-carboxymethyl-2-hydroxymuconate delta-isomerase activity | 2/557 | 0.0379 | molecular_function |
| GO:0043711 | pilus organization | 4/557 | 0.0401 | biological_process |
| GO:0008410 | CoA-transferase activity | 3/557 | 0.0457 | molecular_function |
| GO:0015627 | type II protein secretion system complex | 4/557 | 0.0491 | cellular_component |
